# Supplementary material
Source: PubMed Central journal article supplement (PMC10101925)
Supplement: NIHMS1873096-supplement-1.pdf [file NIHMS1873096-supplement-1.pdf]

Figure S1

A

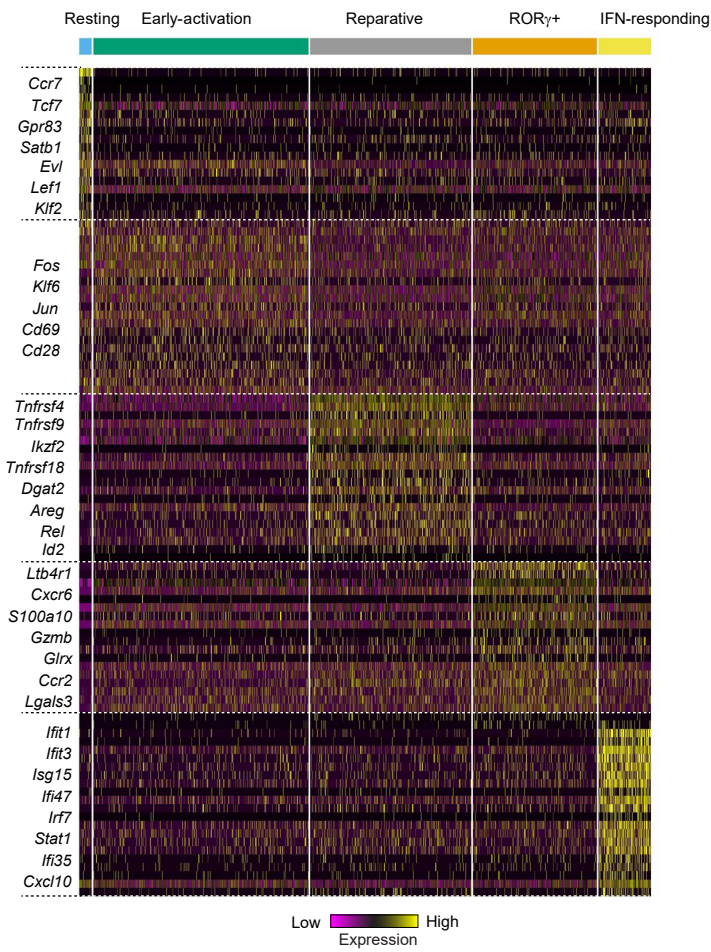

B

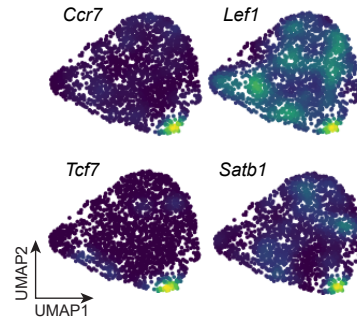

C

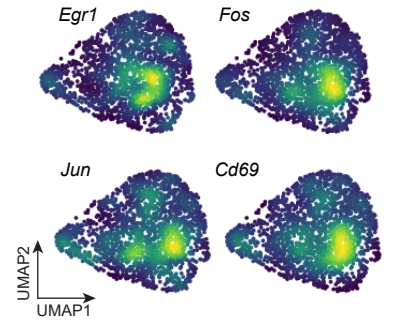

D

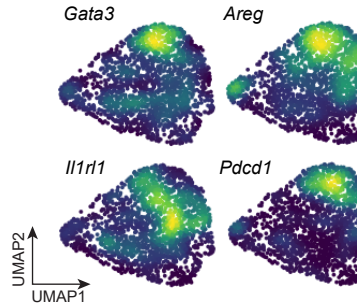

E

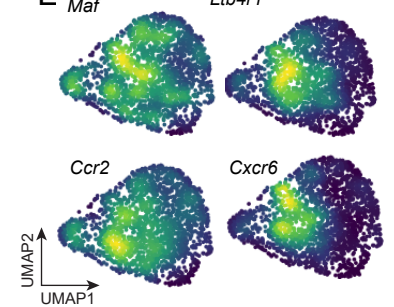

F

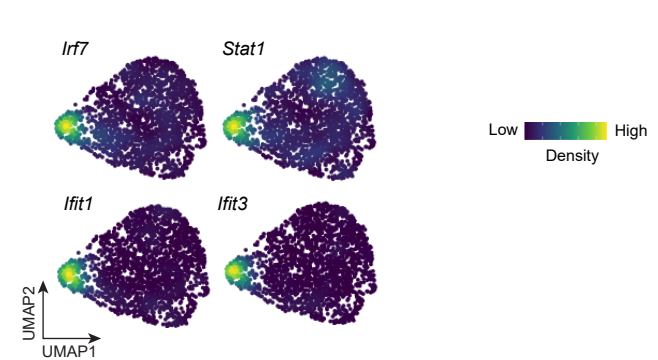

G

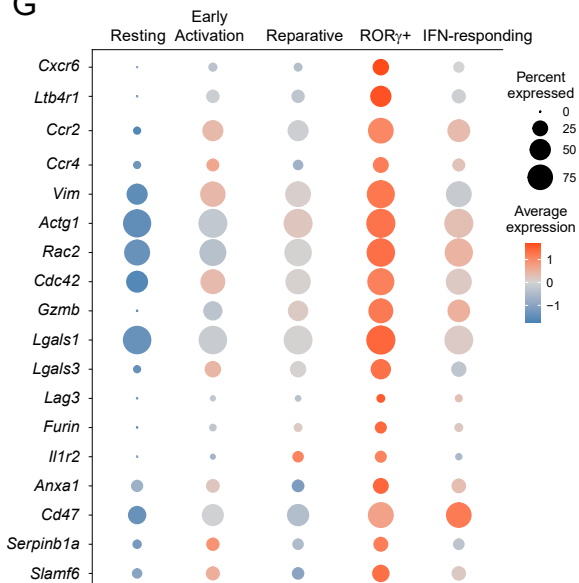

H

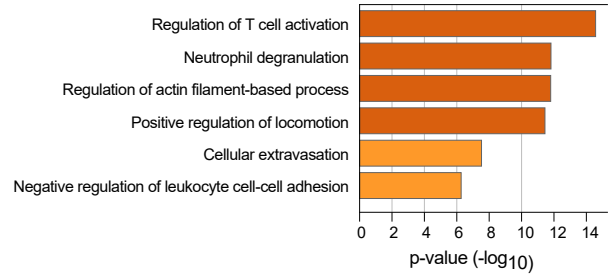

I

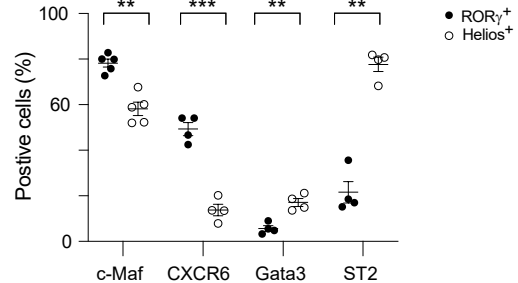

**Figure S1 (Related to Figure 1): Characterization of ROR $\gamma$ <sup>+</sup> Treg cells in skeletal muscle after acute injury**

(A-H) scRNA-seq of Treg cells from hindlimb muscles of *Foxp3<sup>GFP</sup>* mice 3 days after CTX-induced injury. A) Heatmap of the top 20 differentially expressed genes in each cluster *vis-à-vis* all other clusters. B) Resting, C) early-activation, D) reparative, E) ROR $\gamma$ <sup>+</sup> and F) IFN-responding Treg clusters' expression of key marker genes shown as density plots. G) Bubble-plot of the average transcript expression of key ROR $\gamma$ <sup>+</sup> Treg cell marker genes. H) Pathway analysis of up-regulated transcripts in the ROR $\gamma$ <sup>+</sup> Treg subtype relative to other subtypes. (I) Flow-cytometry of c-Maf, CXCR6, Gata3 and ST2 expression in ROR $\gamma$ <sup>+</sup> and Helios<sup>+</sup> muscle Treg cells 3 days after CTX injury. Unpaired t-test (I).

Figure S2

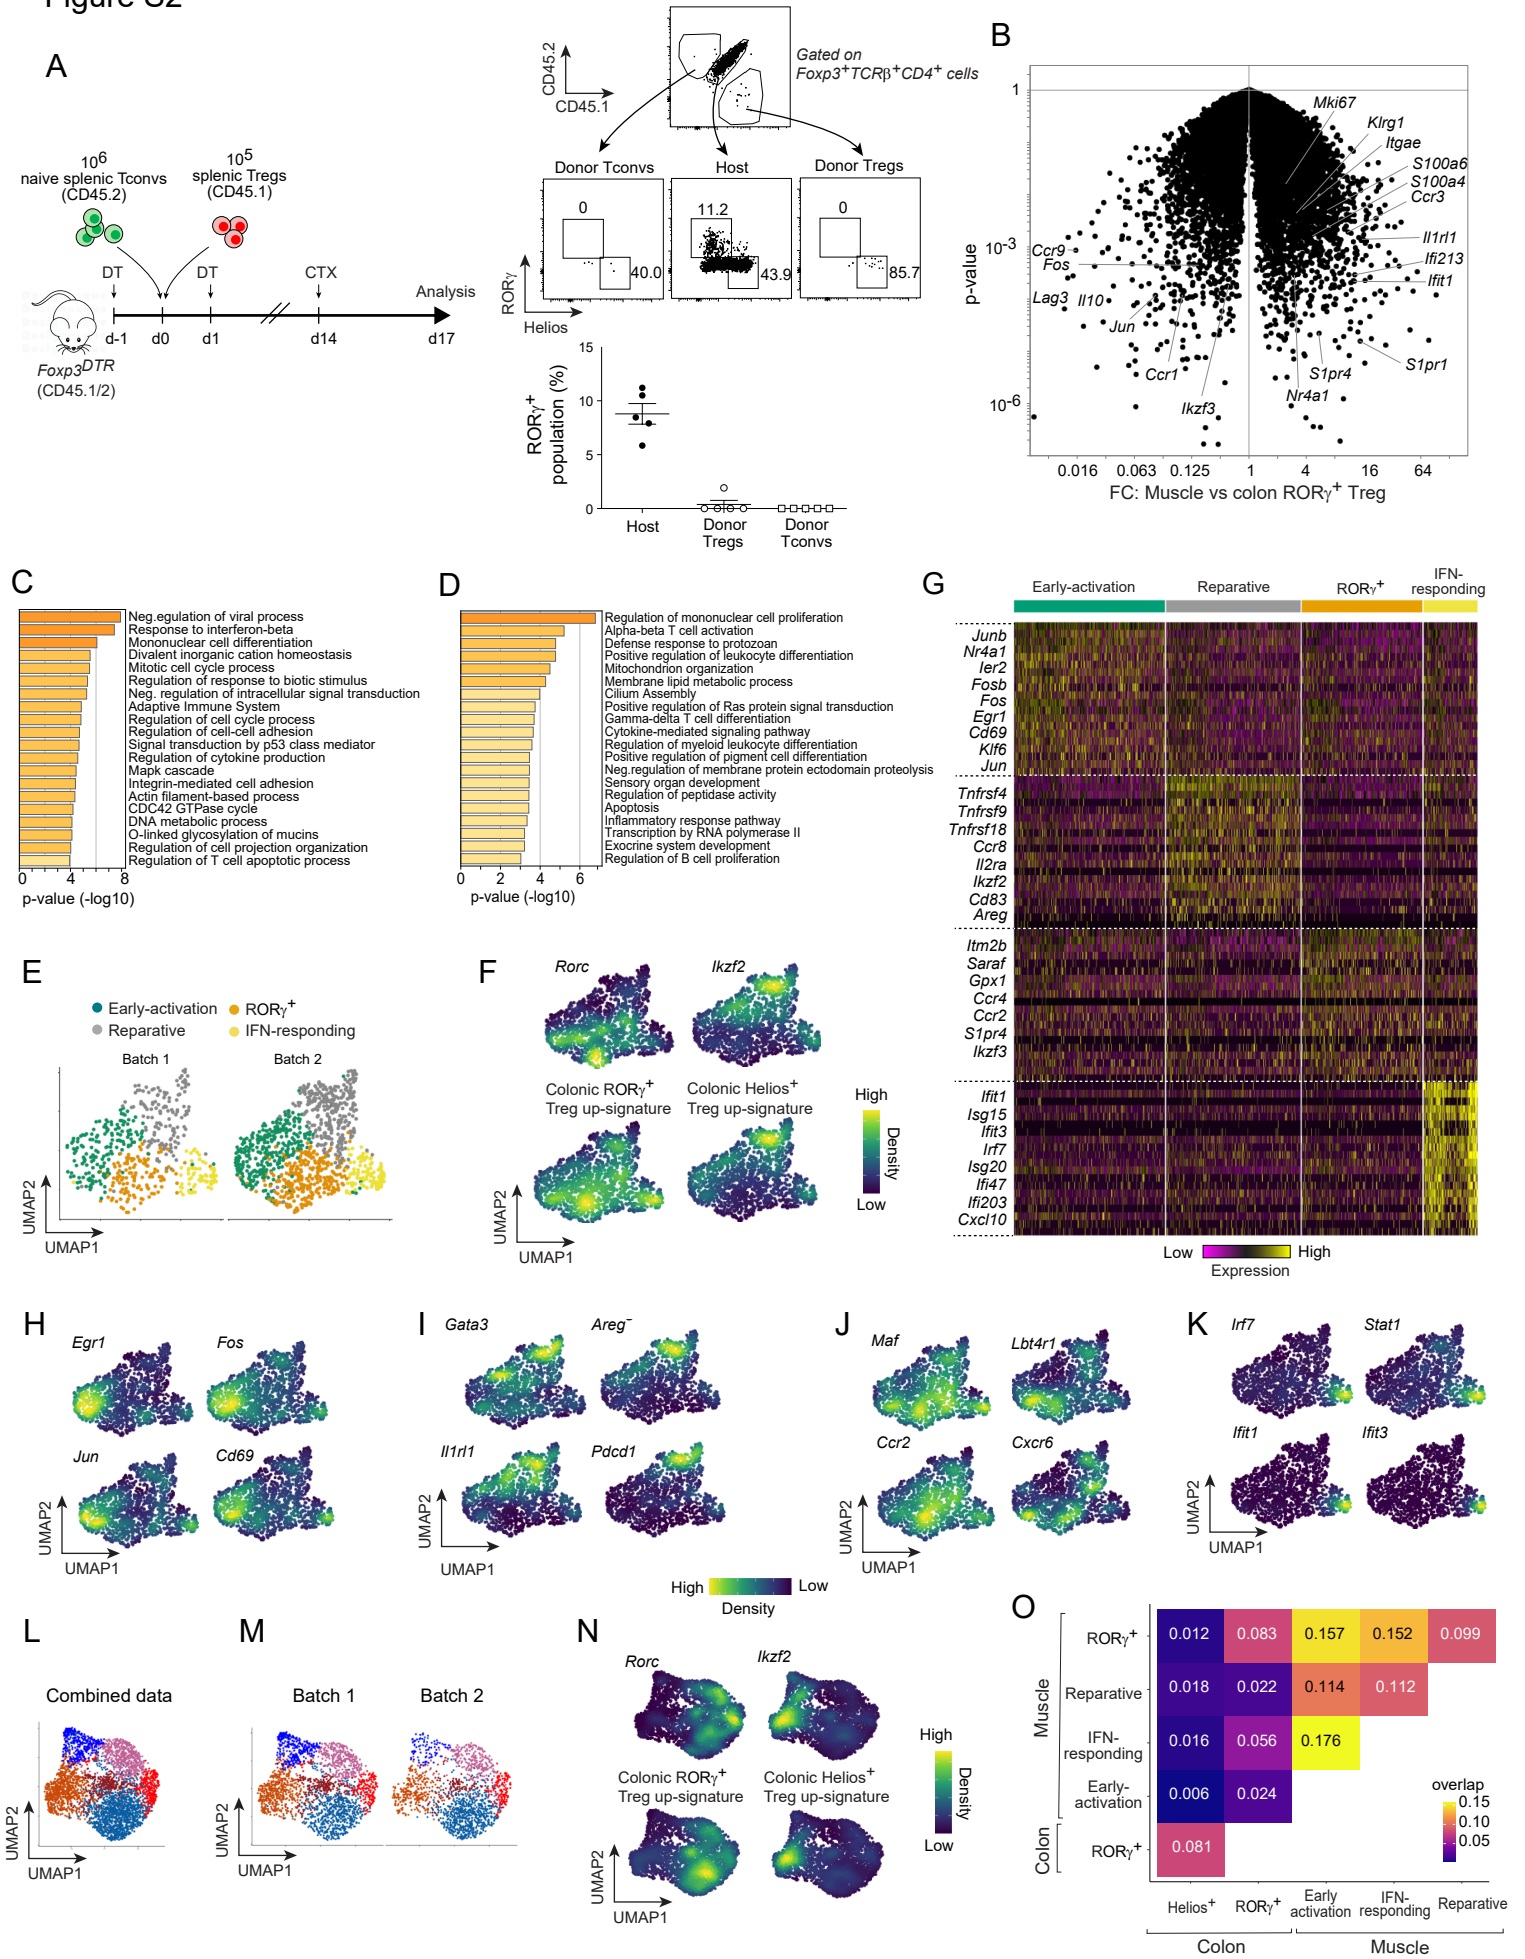

## Figure S2 (Related to Figure 2): Relationship between muscle and colon ROR $\gamma$ <sup>+</sup> Treg cells

(A) Congenically labelled naïve Tconv or Treg cells were sorted from spleen and transferred into Treg-depleted *Foxp3<sup>DTR</sup>* mice followed by CTX-induced injury. Experimental design (left), representative dot-plots (top right) and summary data (bottom right) of ROR $\gamma$ <sup>+</sup> fraction within muscle Foxp3<sup>+</sup> cells originating from each donor pool. (B-D) *Foxp3<sup>Thy1.1</sup> × Rorc<sup>GFP/wt</sup>* male mice were injected with CTX. After 3 day, ROR $\gamma$ <sup>+</sup> Treg cells (CD4<sup>+</sup>TCR $\beta$ <sup>+</sup>Foxp3<sup>Thy1.1</sup>+ROR $\gamma$ <sup>GFP+</sup>) were sorted from muscle and colon, and their transcriptional profiles were determined using population-level RNA-seq. B) Volcano plot illustrating FC differences between the two populations. C) Pathway analysis of up-regulated transcripts in muscle, and D) colon ROR $\gamma$ <sup>+</sup> Treg cells. (E-O) Paired scRNA-seq and scTCR-seq of muscle (E-K) or colon (L-N) Treg cells from 6 individual *Foxp3<sup>GFP</sup>* mice on day 3 after CTX injection. E) 2D UMAP plot of muscle Treg cells illustrating the distribution of cells from two experimental batches. F) Density plot of the indicated genes and signatures. G) Heatmap of the top 20 differentially expressed genes in each cluster. H) Early-activation, I) reparative, J) ROR $\gamma$ <sup>+</sup> and K) IFN-responding Treg clusters' expression of key marker genes shown as density plots. L) 2D UMAP plot of colon Treg cells; and M) cell distribution across two experimental batches. N) Density plot of *Rorc*, *Ikzf2*, and the colonic ROR $\gamma$ <sup>+</sup> or Helios<sup>+</sup> Treg up-signatures. O) Heatmap of the clonal overlap score between different muscle and colon Treg subtypes.

Figure S3

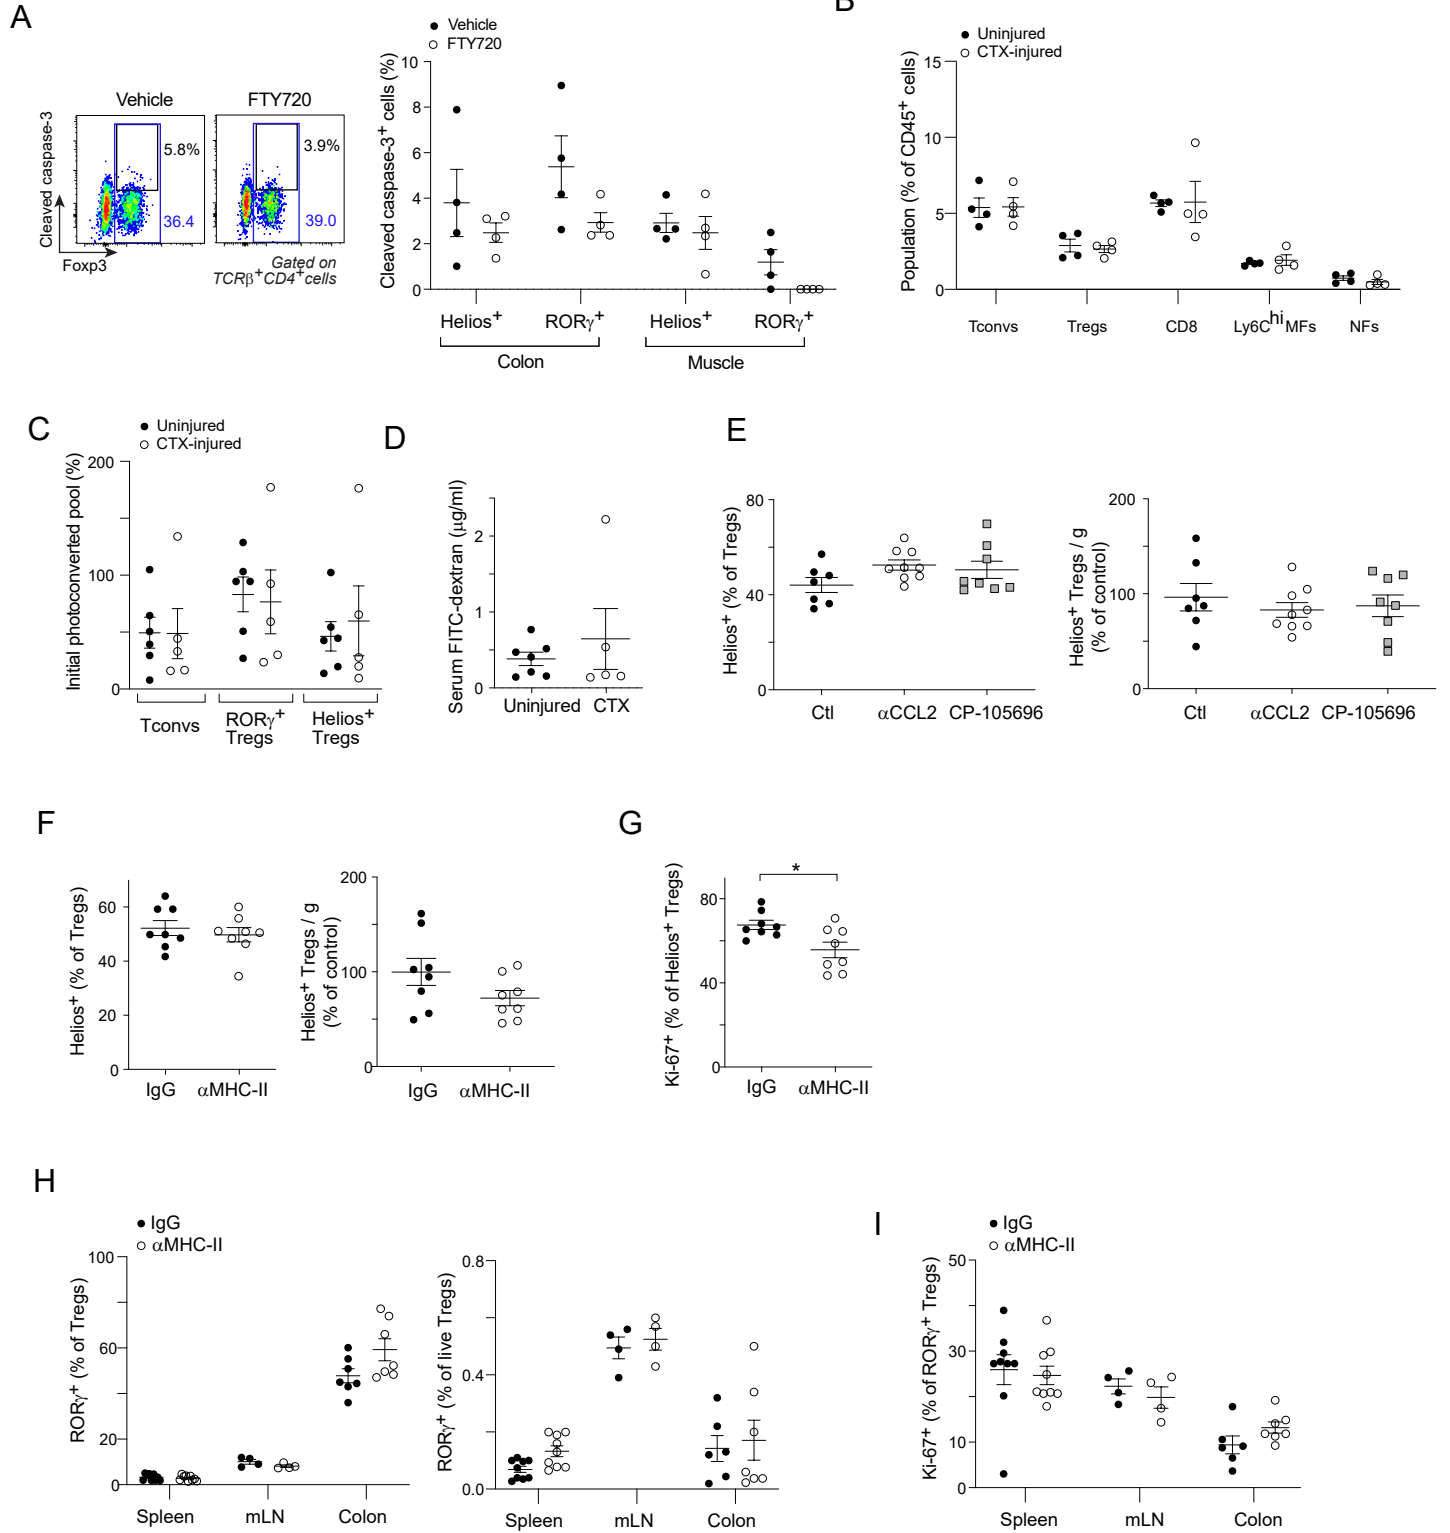

**Figure S3 (Related to Figure 3): Mechanisms of ROR $\gamma$ <sup>+</sup> Treg accumulation in regenerating muscle**

(A) Flow-cytometric quantification of cleaved caspase-3 in colon and muscle Helios<sup>+</sup> and ROR $\gamma$ <sup>+</sup> Treg cells after 1 day of CTX-induced injury in vehicle- or FTY720-treated mice. Representative dot-plots (middle, one experiment) and summary data. (B) Flow-cytometric quantification of the indicated immunocyte compartments in the colon of uninjured or 3 day-injured mice. (C) The descending colon of Kaede mice was photoconverted (PhC) and hindlimb muscle were injected or not with CTX. Flow-cytometric quantification of egress of diverse lymphocyte populations from the colon after 24 hr in uninjured and CTX-injured mice. (D) Intestinal permeability, as measured by FITC-dextran concentrations in the serum, in uninjured or 3-day injured mice. (E) Flow-cytometric quantification of Helios<sup>+</sup> Treg cell fraction (left) and number (right) in hindlimb muscles 2 days after CTX-induced injury in control- (Ctl),  $\alpha$ CCL2-, or CP-105696-treated mice. (F-I) Mice were treated with isotype (IgG) or anti-mouse MHC Class II (I-A/I-E) antibody ( $\alpha$ MHC-II), and flow-cytometric quantification was performed 3 days after CTX injury. F) Muscle Helios<sup>+</sup> Treg cell fraction (left) and number (right). G) Ki-67<sup>+</sup> fraction in muscle Helios<sup>+</sup> Treg cells. H) ROR $\gamma$ <sup>+</sup> Treg cell fraction, and G) Ki-67<sup>+</sup> fraction in ROR $\gamma$ <sup>+</sup> Treg cells from diverse organs. Unpaired t-test (G). MFs: macrophages; NFs: neutrophils; mLN: mesenteric lymph nodes.

Figure S4

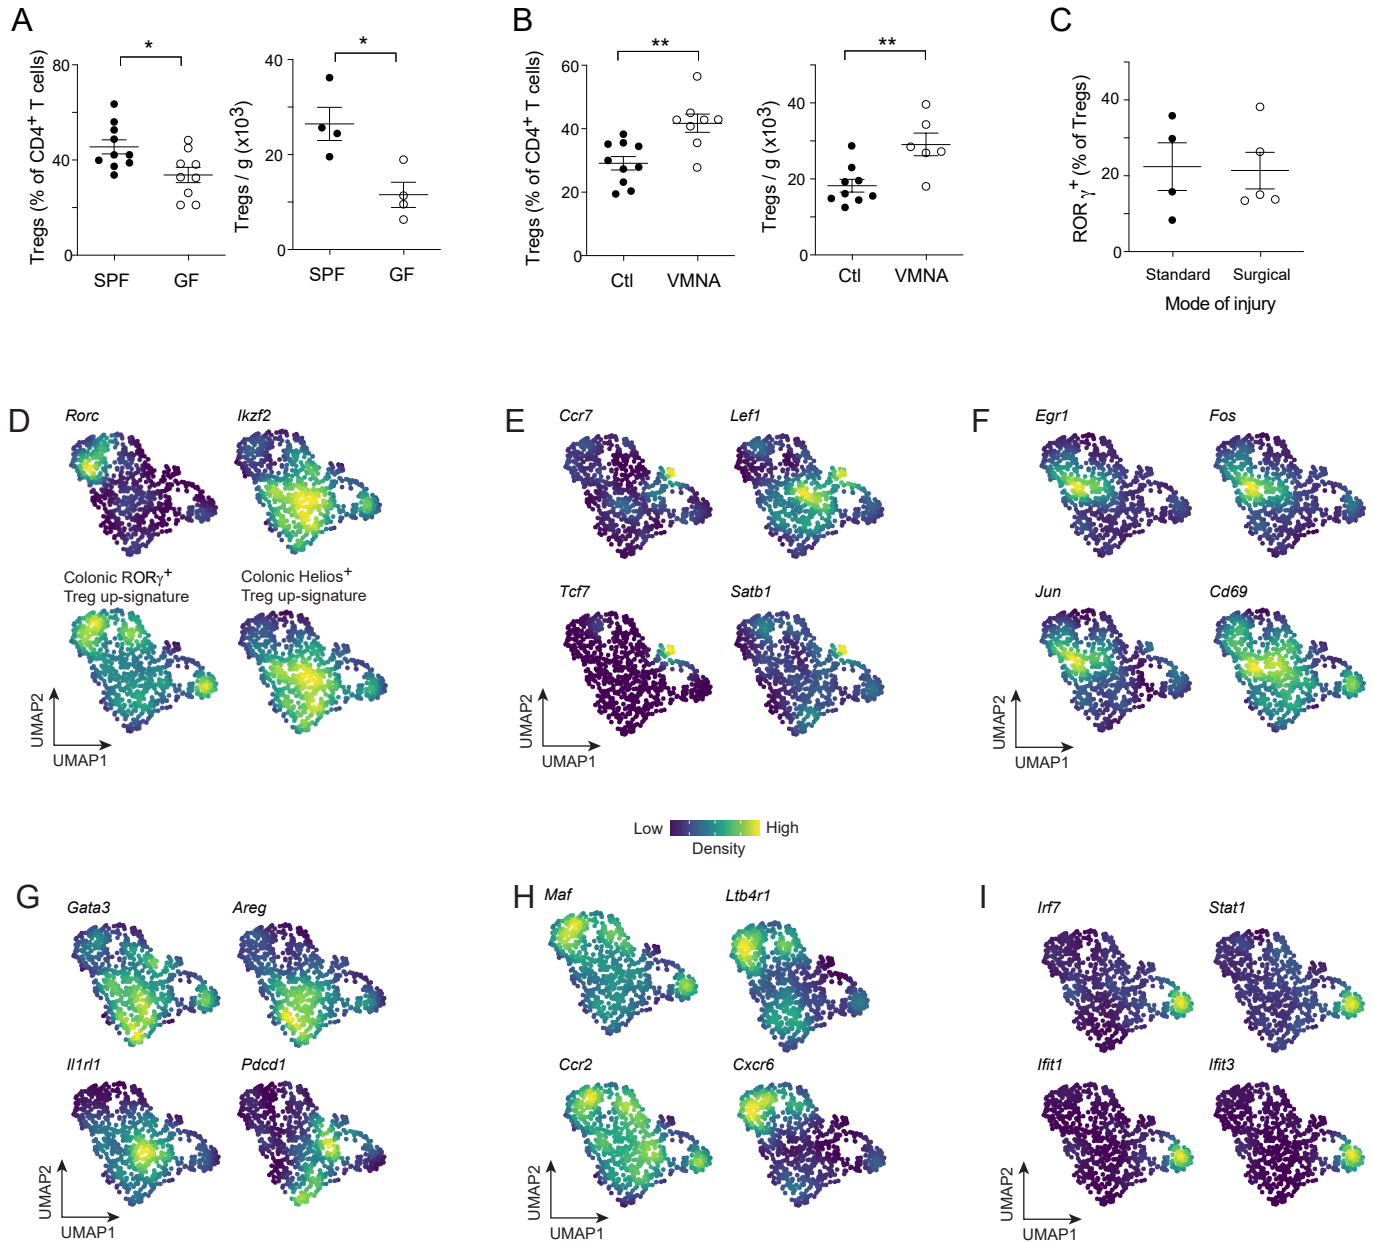

**Figure S4 (Related to Figure 4): Microbiota impacts on muscle Treg cells after acute injury**

(A) Flow-cytometric quantification of total Treg cell fraction (left) and number (right) in hindlimb muscle 3 days after CTX-induced injury of specific-pathogen-free (SPF) or germ-free (GF) mice. (B) Same as A except SPF mice were treated or not with the antibiotic cocktail, VMNA (vancomycin, metronidazole, neomycin, ampicillin). (C) Flow-cytometric quantification of muscle ROR $\gamma$ <sup>+</sup> Treg cells 3 days after standard or sterile surgical CTX-induced injury. (D-I) scRNA-seq comparison of muscle Treg cells from vehicle- and VMNA-treated *Foxp3*<sup>GFP</sup> mice 3 days after CTX injury. D) Density plot of *Rorc*, *Ikzf2*, the colonic ROR $\gamma$ <sup>+</sup>, and Helios<sup>+</sup> Treg up-signatures. E) Resting, F) early-activation, G) reparative, H) ROR $\gamma$ <sup>+</sup>, and I) IFN-responding Treg clusters' expression of key marker genes shown as density plots. Unpaired t-test (A, B).

Figure S5

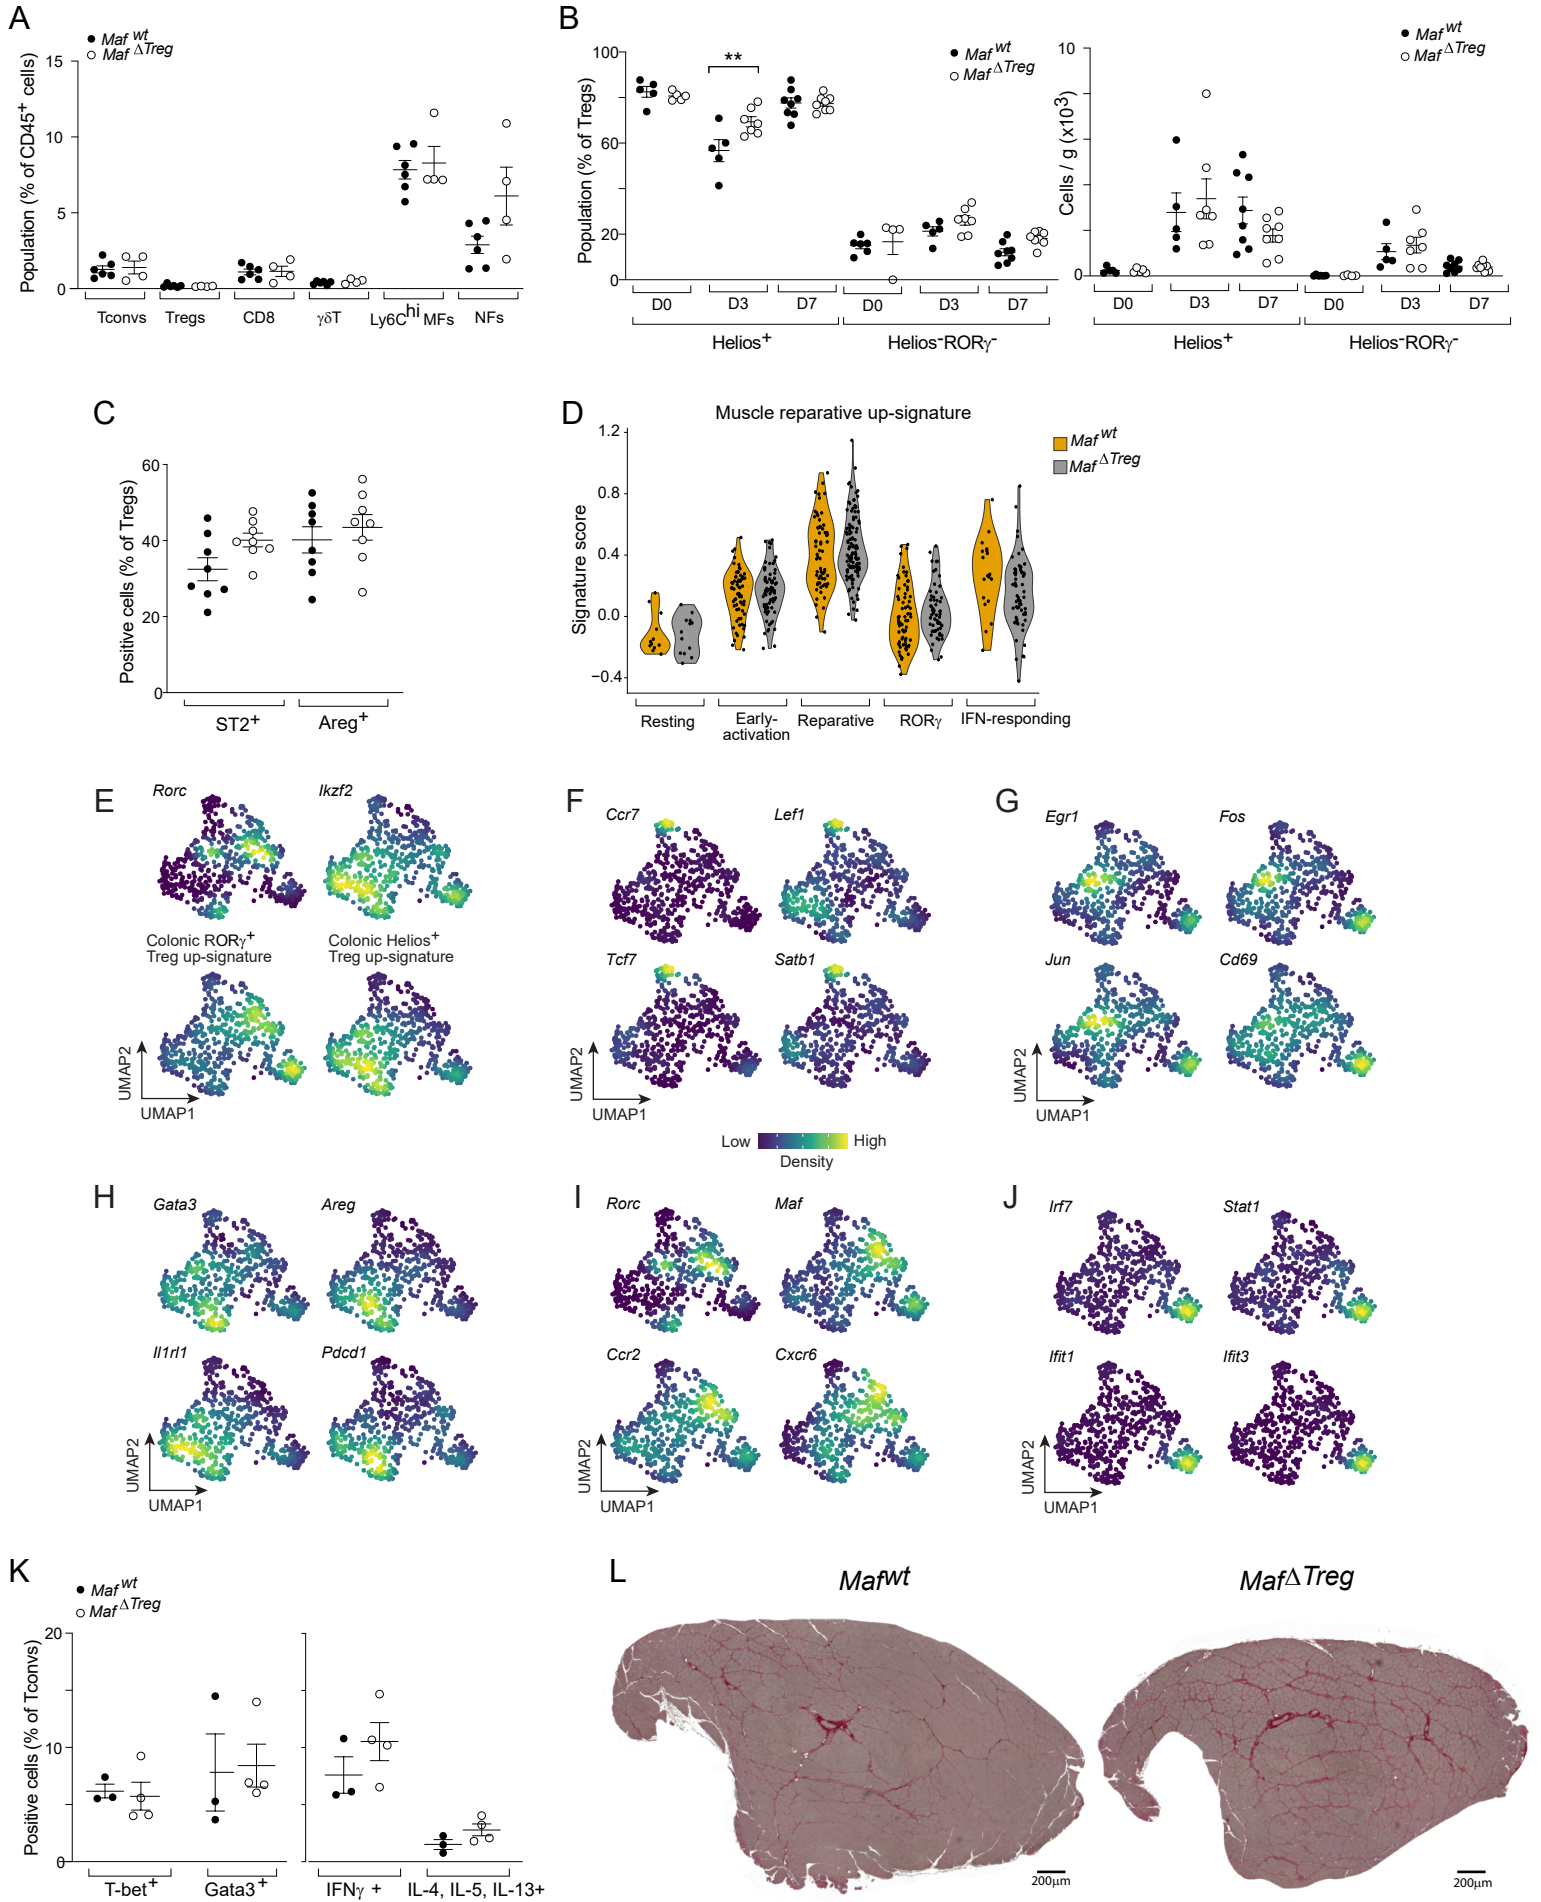



**Figure S5 (Related to Figure 5): Regulation of muscle inflammation and fibrosis by ROR $\gamma$ <sup>+</sup> Treg cells**

Comparisons of hindlimb muscles from *Ma<sup>f</sup><sup>wt</sup>* and *Ma<sup>f</sup> <sup>$\Delta$ Treg</sup>* littermates 0, 3 or 7 days after CTX-induced injury. (A) Flow-cytometric quantification of the indicated immunocyte compartments in muscle at steady-state. (B) Flow-cytometric quantification of the fraction (left) and number (right) of muscle Helios<sup>+</sup> and Helios<sup>-</sup> ROR $\gamma$ <sup>-</sup> Treg cells. (C) Flow-cytometric quantification of ST2 and Areg in muscle Treg cells 7 days after CTX-induced injury. (D-J) scRNA-seq comparison of muscle Treg cells from *Ma<sup>f</sup><sup>wt</sup>* and *Ma<sup>f</sup> <sup>$\Delta$ Treg</sup>* mice 3 days after CTX-induced injury. D) Violin plot of the expression of muscle reparative Treg up-signature genes across different Treg subtypes in the two genotypes. E) Density plot of *Rorc*, *Ikzf2*, colonic ROR $\gamma$ <sup>+</sup>, and Helios<sup>+</sup> Treg up-signatures. F) Resting, G) early-activation, H) reparative, I) ROR $\gamma$ <sup>+</sup> and J) IFN-responding Treg clusters' expression of key marker genes shown as density plots. (K) Flow-cytometric quantification of T-bet<sup>+</sup> and Gata3<sup>+</sup> (left), and (PMA+ionomycin)-stimulated production of IFN $\gamma$  and IL-4+IL-5+IL-13 by muscle Tconv cells 3 days after CTX injury. (L) Representative images of picosirius red staining 7 days after CTX injury (4 independent experiments). Two-way ANOVA (B).

Figure S6

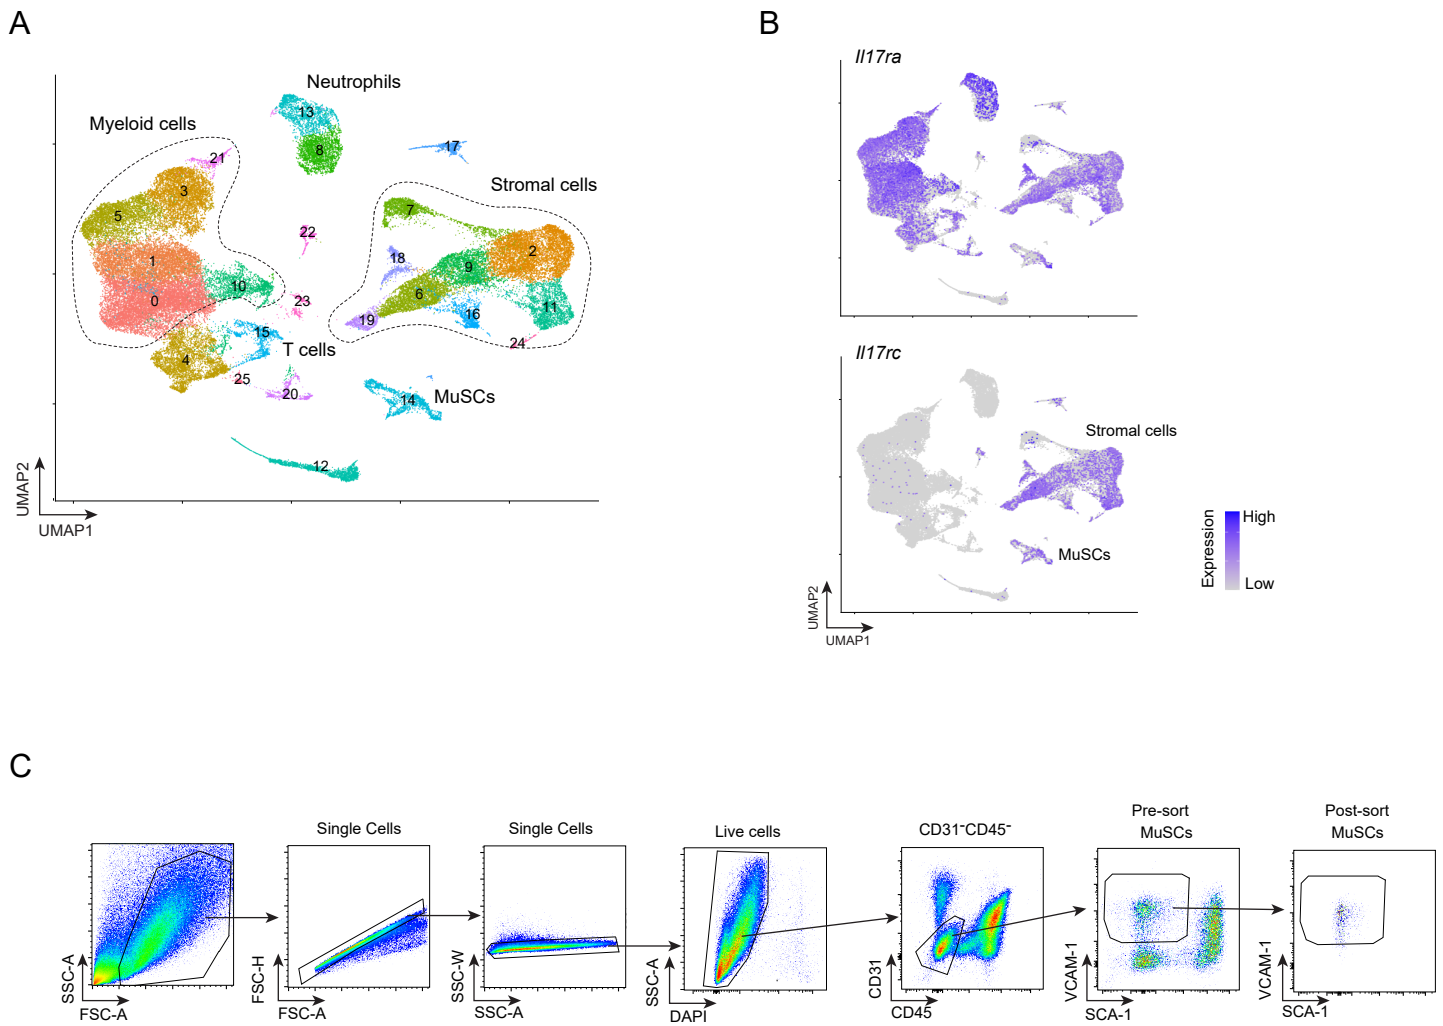

**Figure S6 (Related to Figure 6): Regulation of muscle stem cells by IL-17A**

(A, B) scRNA-seq of whole muscle cells after acute injury (taken from Oprescu et al.). A) 2D UMAP plot. B) Feature plots of *Il17ra* and *Il17rc* expression. (C) Gating strategy for flow-cytometric sorting of muscle satellite cells (MuSCs) from hindlimb muscles.

Figure S7

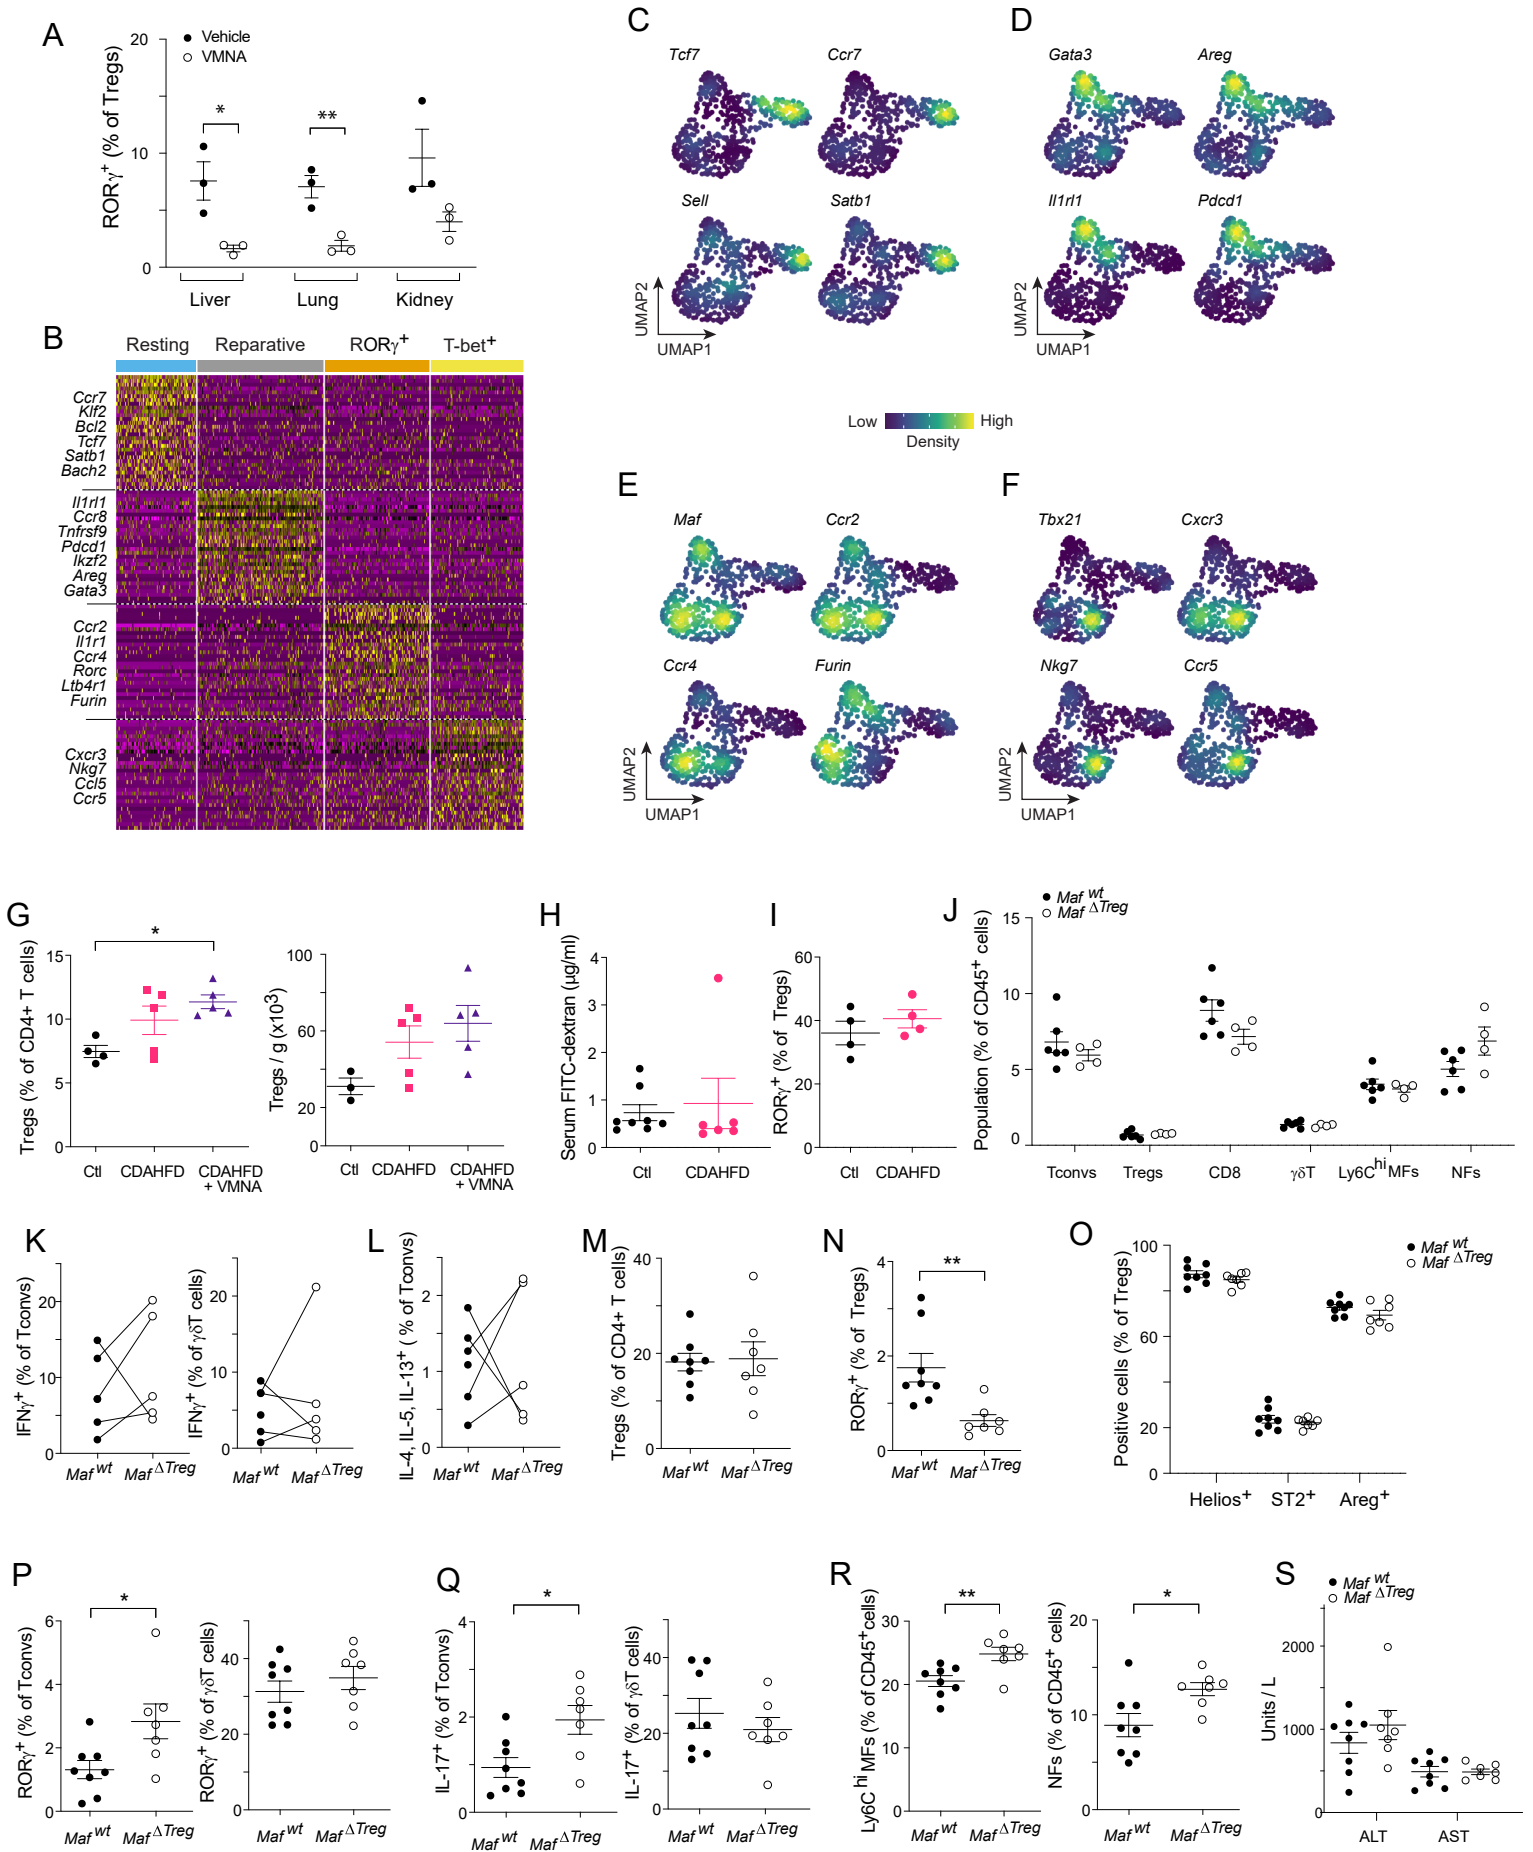

**Figure S7 (Related to Figure 7): Regulation of inflammation in extra-gut tissues by microbiota-dependent ROR $\gamma$ <sup>+</sup> Treg cells**

(A) Flow-cytometric quantification of ROR $\gamma$ <sup>+</sup> Treg cells in diverse tissues of SPF mice that were treated or not with the Abx cocktail, VMNA. (B-F) scRNA-seq of cardiac muscle Treg cells after myocardial infarction (taken from Xia et al.). B) Heatmap of the top 30 differentially expressed genes in each cluster. C) Resting, D) reparative, E) ROR $\gamma$ <sup>+</sup> and F) T-bet<sup>+</sup> Treg clusters' expression of key marker genes shown as density plots. (G) Flow-cytometric quantification of liver Treg cells after one week of feeding with control diet (Ctl) or with choline-deficient, L-amino acid-defined, high-fat diet (CDAHFD)  $\pm$  VMNA. (H, I) B6 mice were fed with Ctl or CDAHFD for one week. H) Intestinal permeability measured by FITC-dextran serum concentrations, and I) flow-cytometric quantification of colon ROR $\gamma$ <sup>+</sup> Treg cells. (J) Flow-cytometric quantification of the indicated liver immunocyte compartments at steady-state in *Ma<sup>f</sup> $\Delta$ Treg* and *Ma<sup>f</sup><sup>wt</sup>* littermates. (K, L) *Ma<sup>f</sup> $\Delta$ Treg* and *Ma<sup>f</sup><sup>wt</sup>* littermates were fed with CDAHFD for one week. Quantification of K) IFN $\gamma$ , and L) IL-4+IL-5+IL-13 expression following PMA+ionomycin stimulation of the indicated effector T cell population. (M-S) *Ma<sup>f</sup> $\Delta$ Treg* and *Ma<sup>f</sup><sup>wt</sup>* littermates were fed with CDAHFD for 8 weeks. Flow-cytometric quantification of liver M) total Treg cells, N) ROR $\gamma$ <sup>+</sup> Treg cells, O) Helios<sup>+</sup>, ST2<sup>+</sup>, Areg<sup>+</sup> Treg cells, P) ROR $\gamma$ <sup>+</sup> Tconv (left) and  $\gamma$  $\delta$ T cells (right), Q) IL-17A production by Tconv and  $\gamma$  $\delta$ T cells, and R) fraction of Ly6C<sup>hi</sup> MFs (left) and NFs (right). S) Plasma concentrations of alanine transaminase (ALT) and aspartate aminotransferase (AST). One-way ANOVA (G), otherwise an unpaired t-test.

**Table S1 (Related to Figures 1, 2, 4 and 5): Summary and quality-control metrics of scRNA-seq datasets**

scRNA-seq

| Dataset                  | Genotype / treatment                                          | Sorting strategy                                         | Hashtaged | Total cells passing QC | Minimum genes / cell threshold | Maximum UMI / cell threshold | Median genes / cell | Median UMI / cell |
|--------------------------|---------------------------------------------------------------|----------------------------------------------------------|-----------|------------------------|--------------------------------|------------------------------|---------------------|-------------------|
| Muscle Tregs d3 post CTX | <i>Foxp3</i> <sup>GFP</sup>                                   | TCRb <sup>+</sup> CD4 <sup>+</sup> Foxp3 <sup>GFP+</sup> | No        | 2020                   | 500                            | 4000                         | 756                 | 1252.5            |
| Muscle Tregs d3 post CTX | <i>Foxp3</i> <sup>GFP</sup> + Vehicle                         | TCRb <sup>+</sup> CD4 <sup>+</sup> Foxp3 <sup>GFP+</sup> | Yes       | 380                    | 1000                           | 7000                         | 1711.5              | 4081.5            |
| Muscle Tregs d3 post CTX | <i>Foxp3</i> <sup>GFP</sup> + VMNA                            | TCRb <sup>+</sup> CD4 <sup>+</sup> Foxp3 <sup>GFP+</sup> | Yes       | 389                    | 1000                           | 7000                         | 1713                | 4152              |
| Muscle Tregs d3 post CTX | <i>Foxp3</i> <sup>YFP-Cre</sup> x <i>Maf</i> <sup>wt/wt</sup> | TCRb <sup>+</sup> CD4 <sup>+</sup> Foxp3 <sup>YFP+</sup> | Yes       | 228                    | 1000                           | 7000                         | 1675.5              | 4166.5            |
| Muscle Tregs d3 post CTX | <i>Foxp3</i> <sup>YFP-Cre</sup> x <i>Maf</i> <sup>fl/fl</sup> | TCRb <sup>+</sup> CD4 <sup>+</sup> Foxp3 <sup>YFP+</sup> | Yes       | 324                    | 1000                           | 7000                         | 1781.5              | 4670.5            |

scRNA-seq/scTcr-seq

| Dataset                         | Genotype / treatment        | Sorting strategy                                         | Hashtaged | Total cells passing QC | Minimum genes / cell threshold | Maximum UMI / cell threshold | Median genes / cell | Median UMI / cell |
|---------------------------------|-----------------------------|----------------------------------------------------------|-----------|------------------------|--------------------------------|------------------------------|---------------------|-------------------|
| Muscle Treg d3 post CTX_batch 1 | <i>Foxp3</i> <sup>GFP</sup> | TCRb <sup>+</sup> CD4 <sup>+</sup>                       | Yes       | 504                    | 750                            | 10000                        | 1450                | 3380              |
| Colon Treg d3 post CTX_batch 1  | <i>Foxp3</i> <sup>GFP</sup> | TCRb <sup>+</sup> CD4 <sup>+</sup> Foxp3 <sup>GFP+</sup> | Yes       | 2281                   | 750                            | 10000                        | 1406                | 3275              |
| Muscle Treg D3 post CTX_batch 2 | <i>Foxp3</i> <sup>GFP</sup> | TCRb <sup>+</sup> CD4 <sup>+</sup>                       | Yes       | 1025                   | 500                            | 5000                         | 899                 | 1692              |
